# Supplementary material for: Formation of FeS Tribofilm from Unsymmetrical Disulfides as Effective Extreme Pressure and Antiwear Additives
Source: Research Square preprint supplement (doi:10.21203/rs.3.rs-1691877/v1), 2022-06-02
Supplement: Supplementary file 1 [file 156c52e6f7cd17afbc6e0f1a.docx]

**Supplementary data**

**Fig. S1.** The (a) 1H NMR, (b) 13C NMR and (c) GCMS spectral data of DDODS

**Fig. S2.** The (a) 1H NMR, (b) 13C NMR and (c) GCMS spectral data of DDDS.

**Fig. S3.** Samples photo: (a) NBO, (b) NBO + 10 wt% DDODS, and (c) NBO + 10 wt% DDDS.

**Fig. S4.** EDS images of the wear tracks generated on the metal surface with different additives at 10 wt% (a) DDODS, and (b) DDDS in NBO.

**Fig. S1.** The (a) 1H NMR, (b) 13C NMR and (c) GCMS spectral data of DDODS.


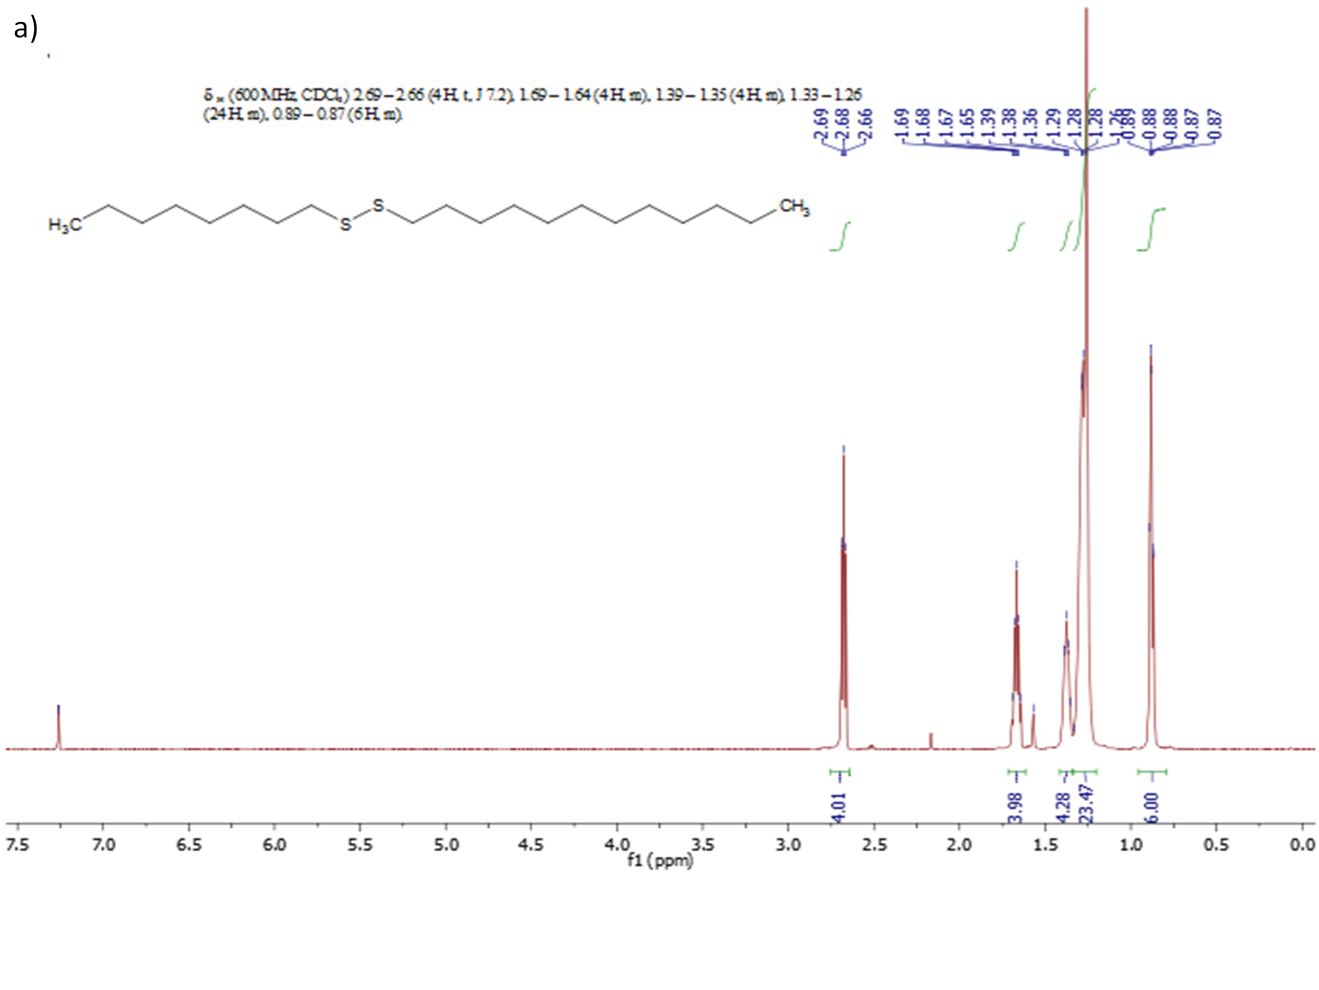


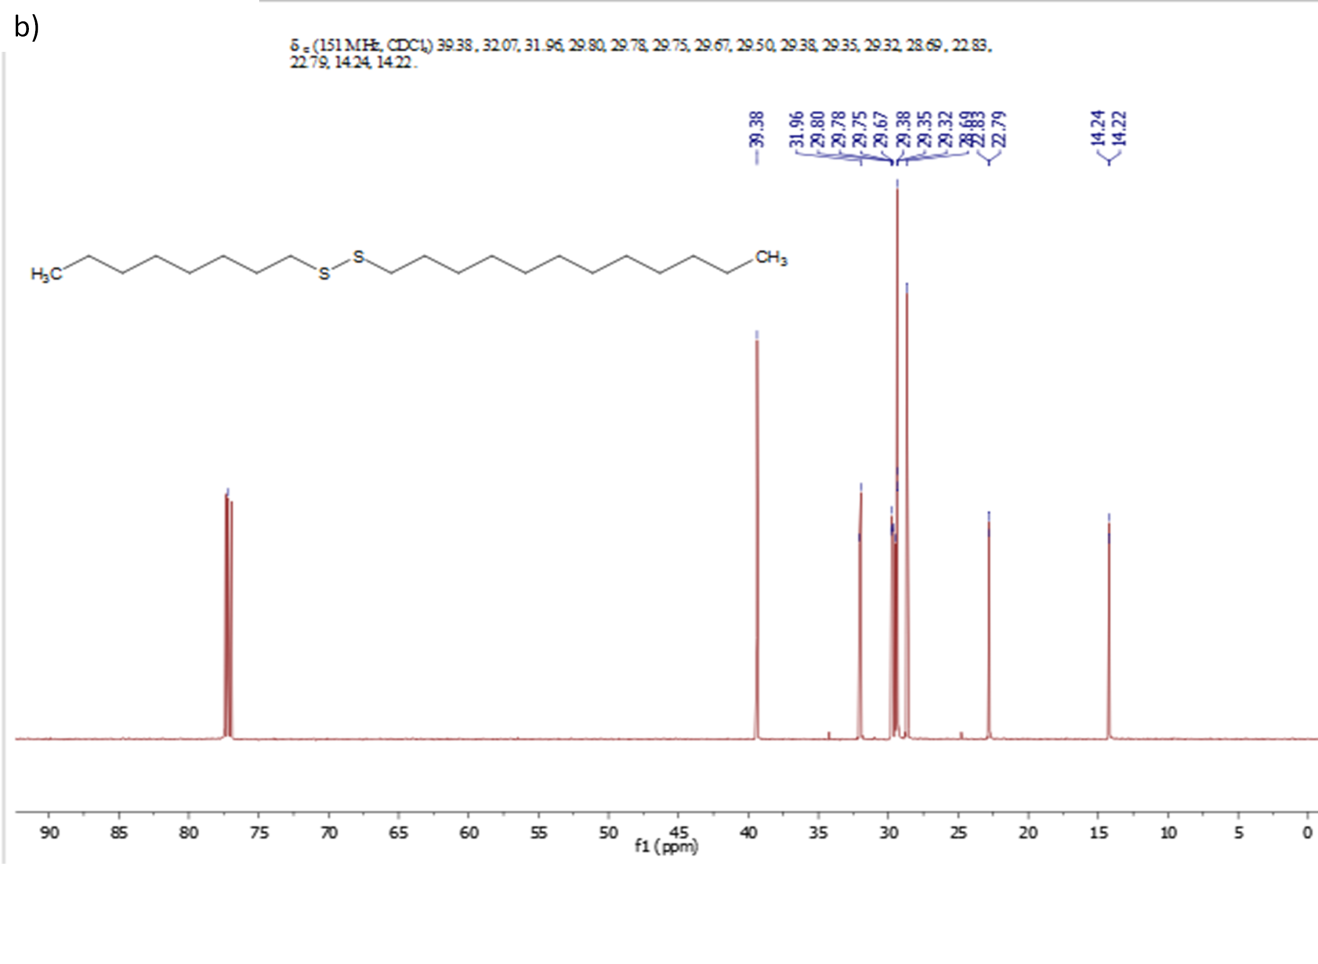


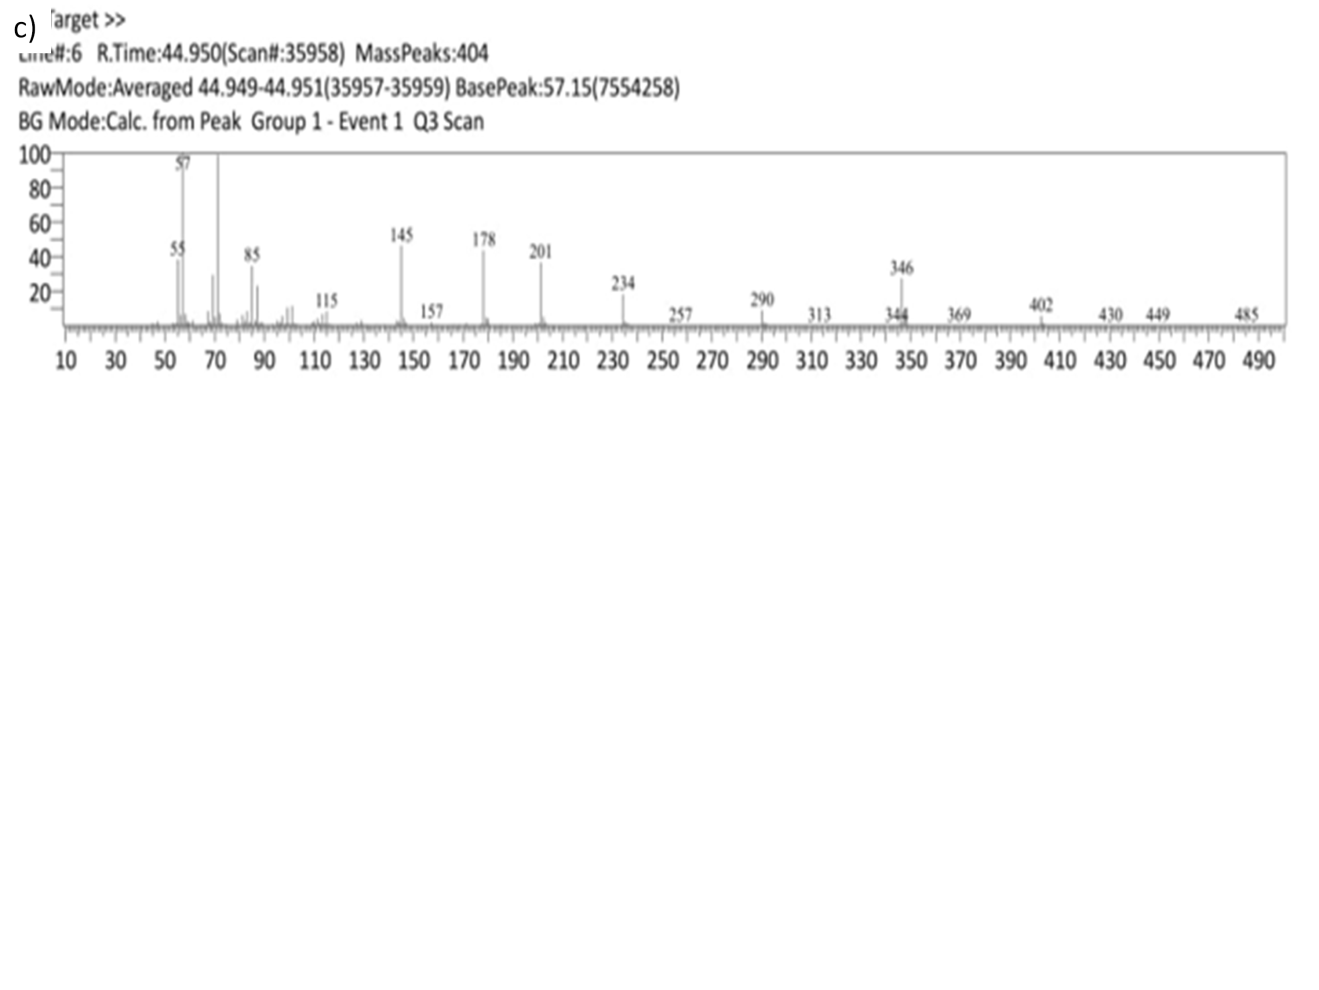


**Fig. S2.** The (a) 1H NMR, (b) 13C NMR and (c) GCMS spectral data of DDDS.


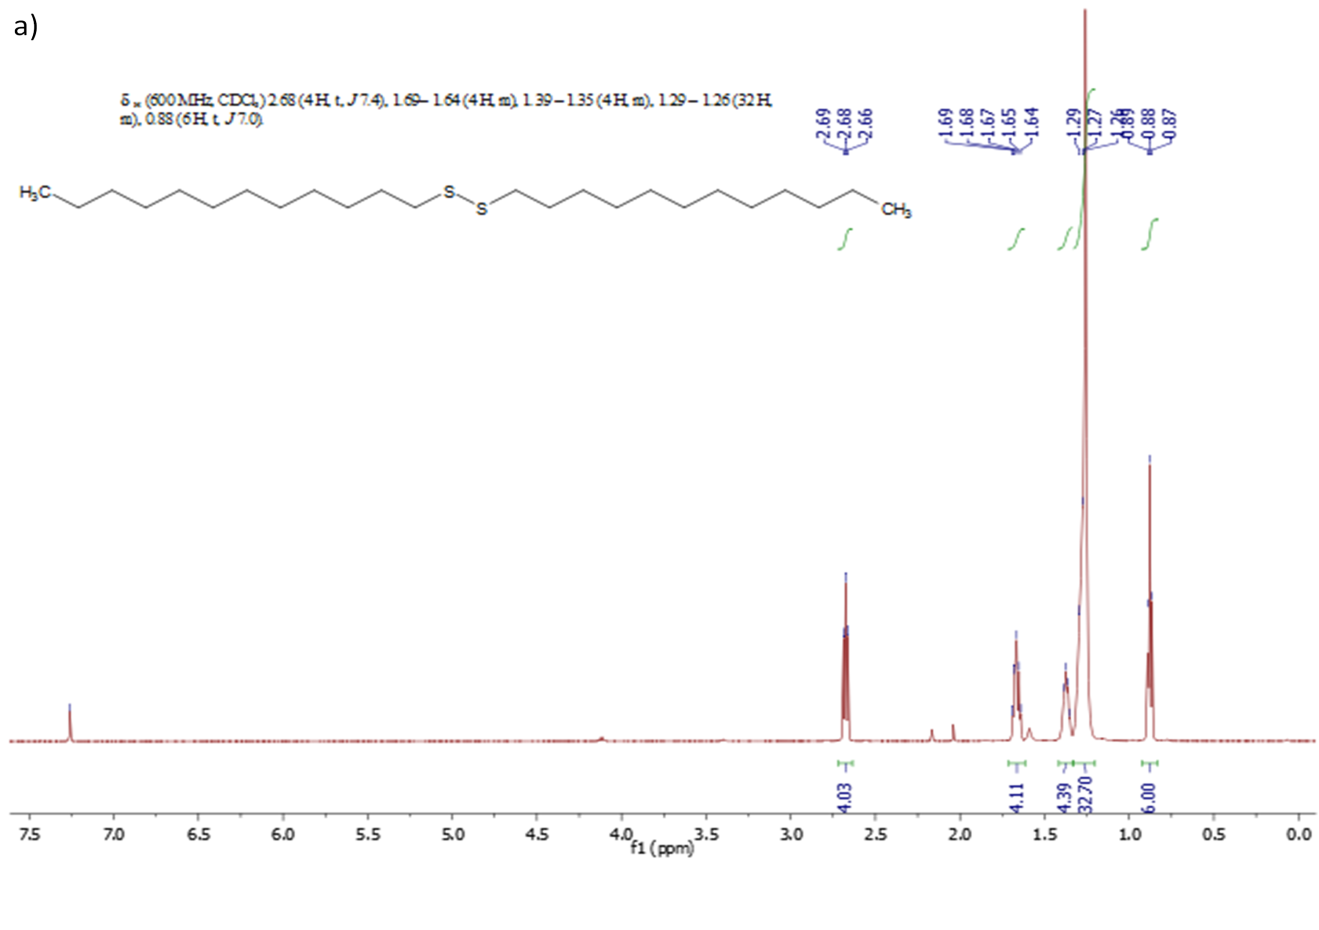


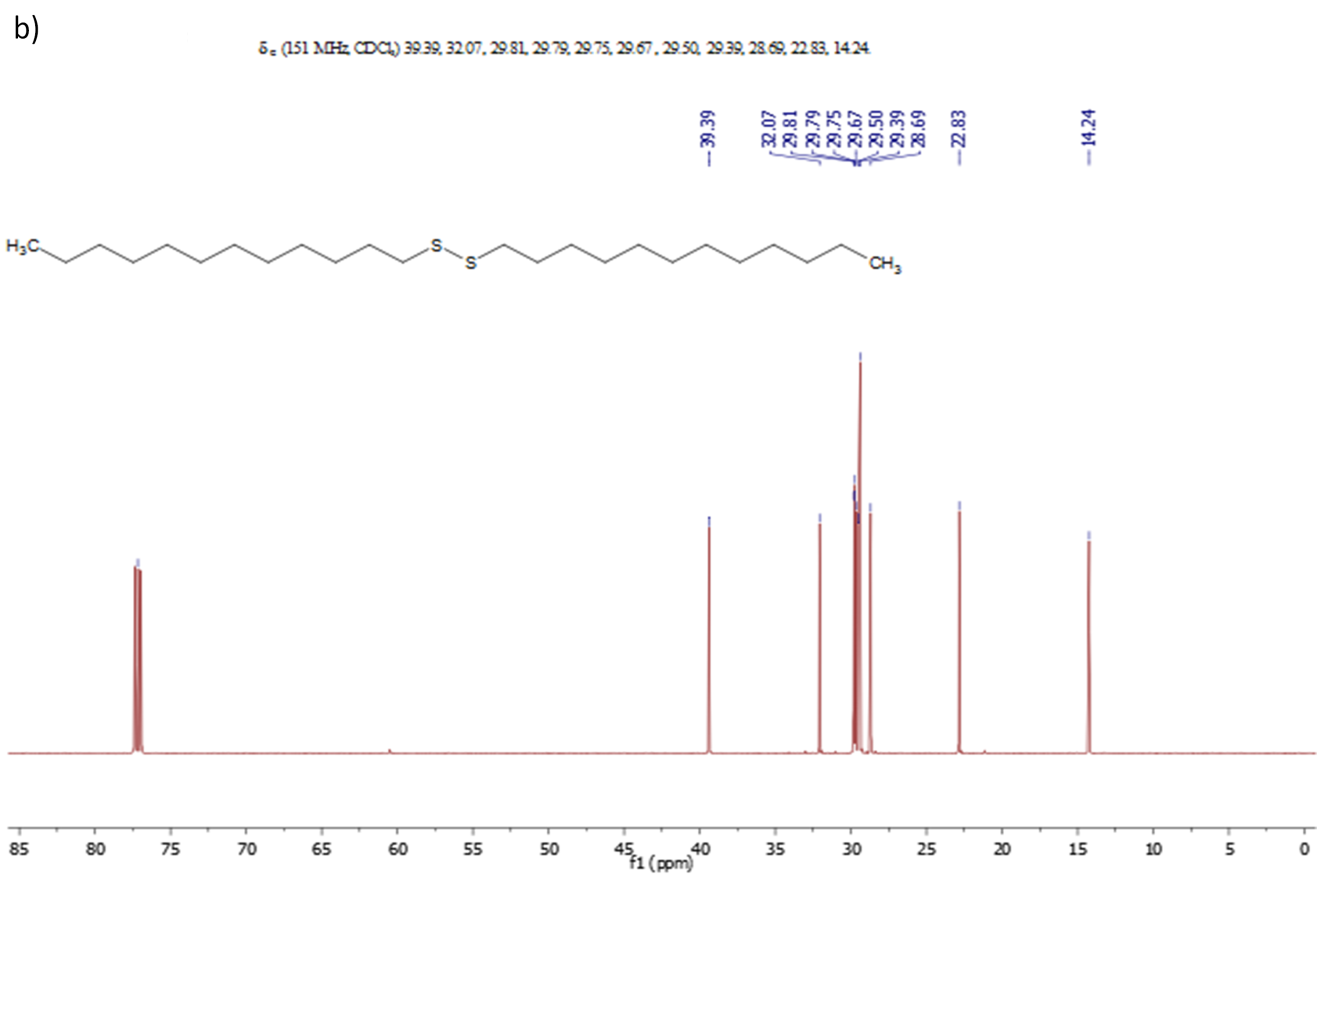


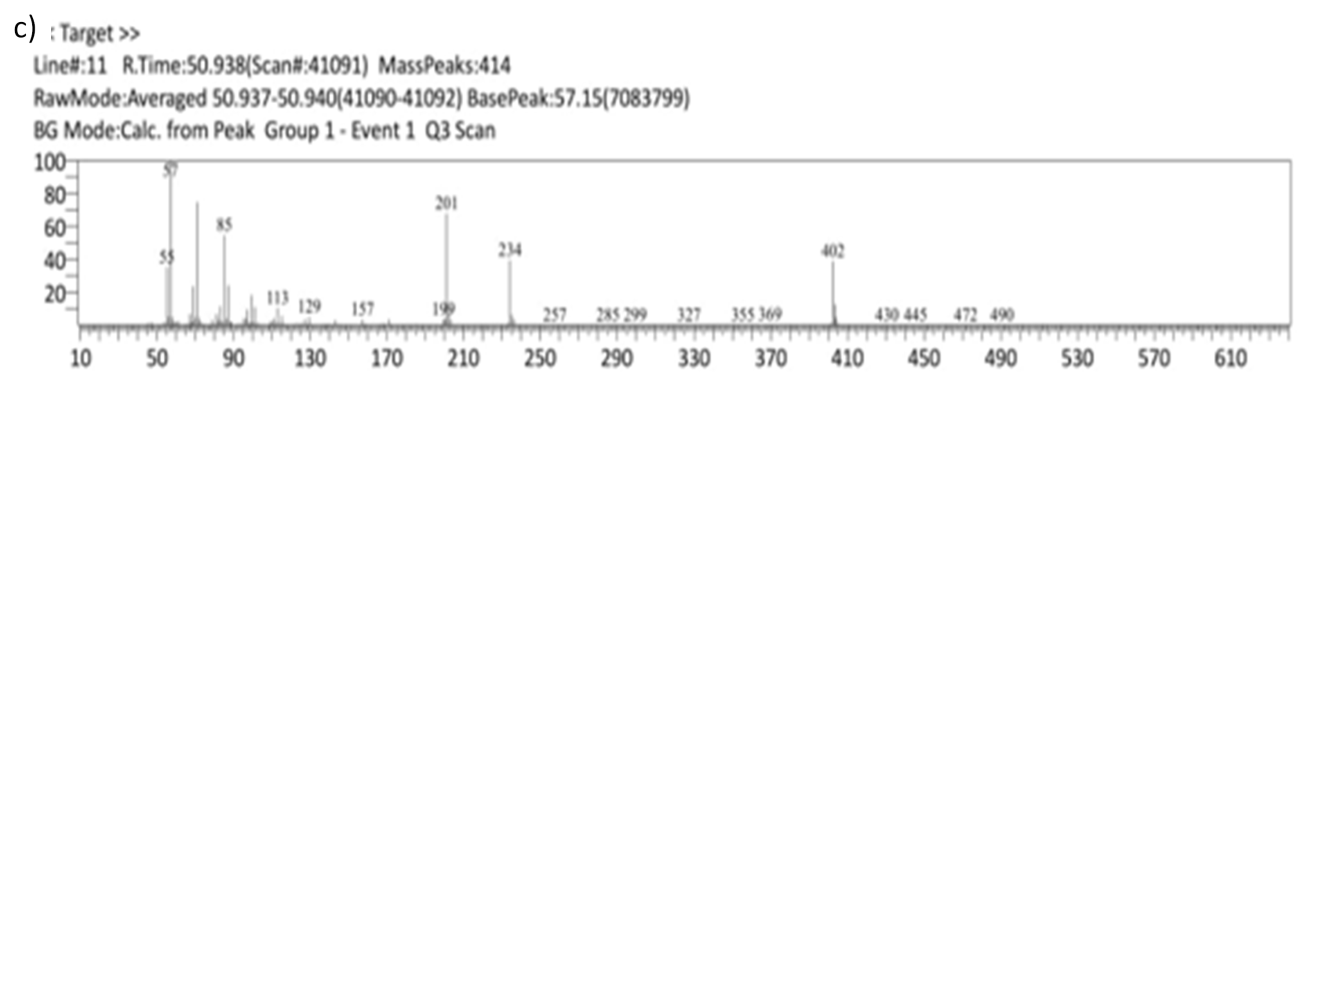


**Fig. S3.** Samples photo: (a) NBO, (b) NBO + 10 wt% DDODS, and (c) NBO + 10 wt% DDDS.


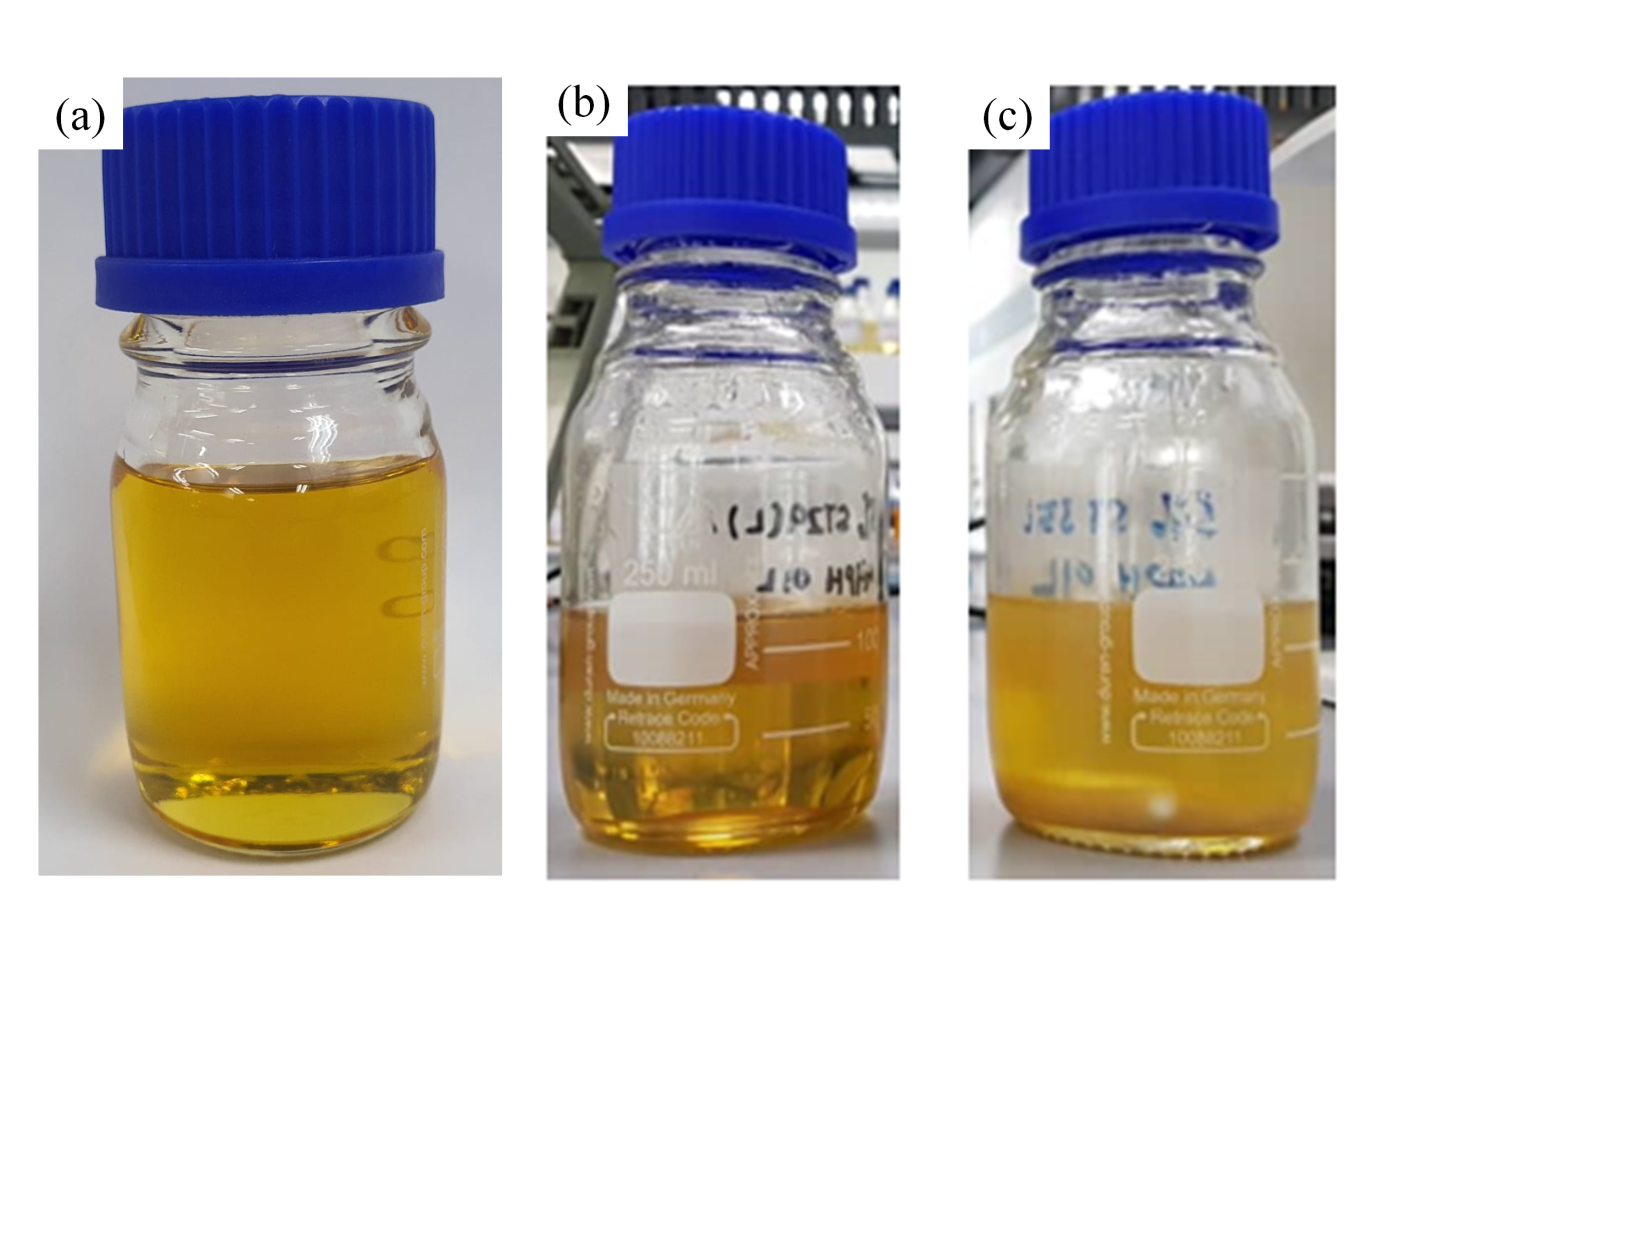


**Fig. S4.** EDS images of the wear tracks generated on the metal surface with different additives at 10 wt% (a) DDODS, and (b) DDDS in NBO.

**
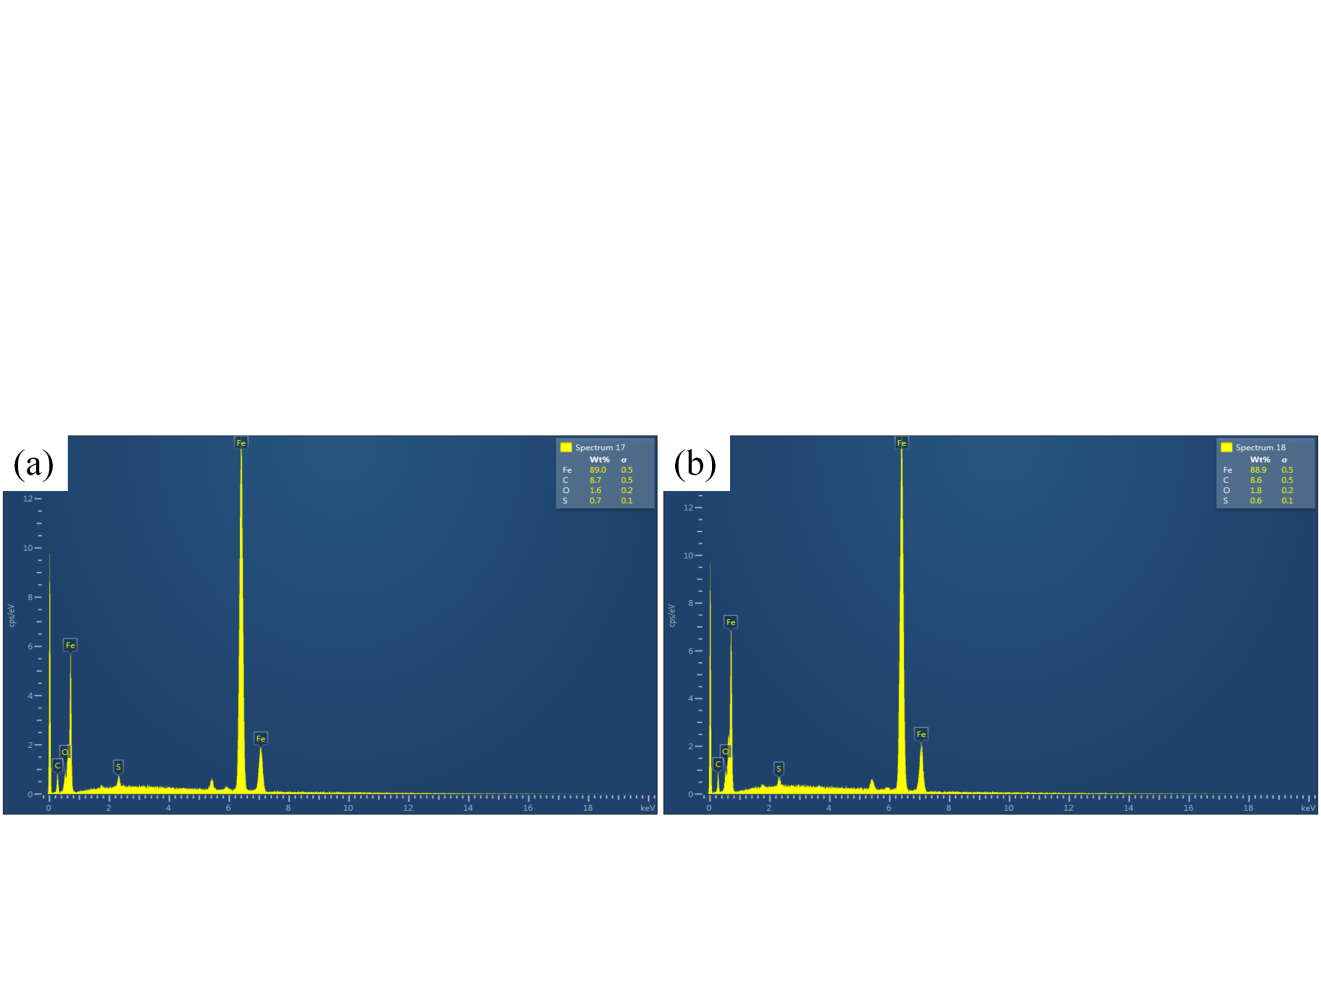
**
