# Supplementary figures and images for: Formation of FeS Tribofilm from Unsymmetrical Disulfides as Effective Extreme Pressure and Antiwear Additives
Source: Research Square preprint supplement (doi:10.21203/rs.3.rs-1691877/v1), 2022-06-02

**Graphical Abstract**


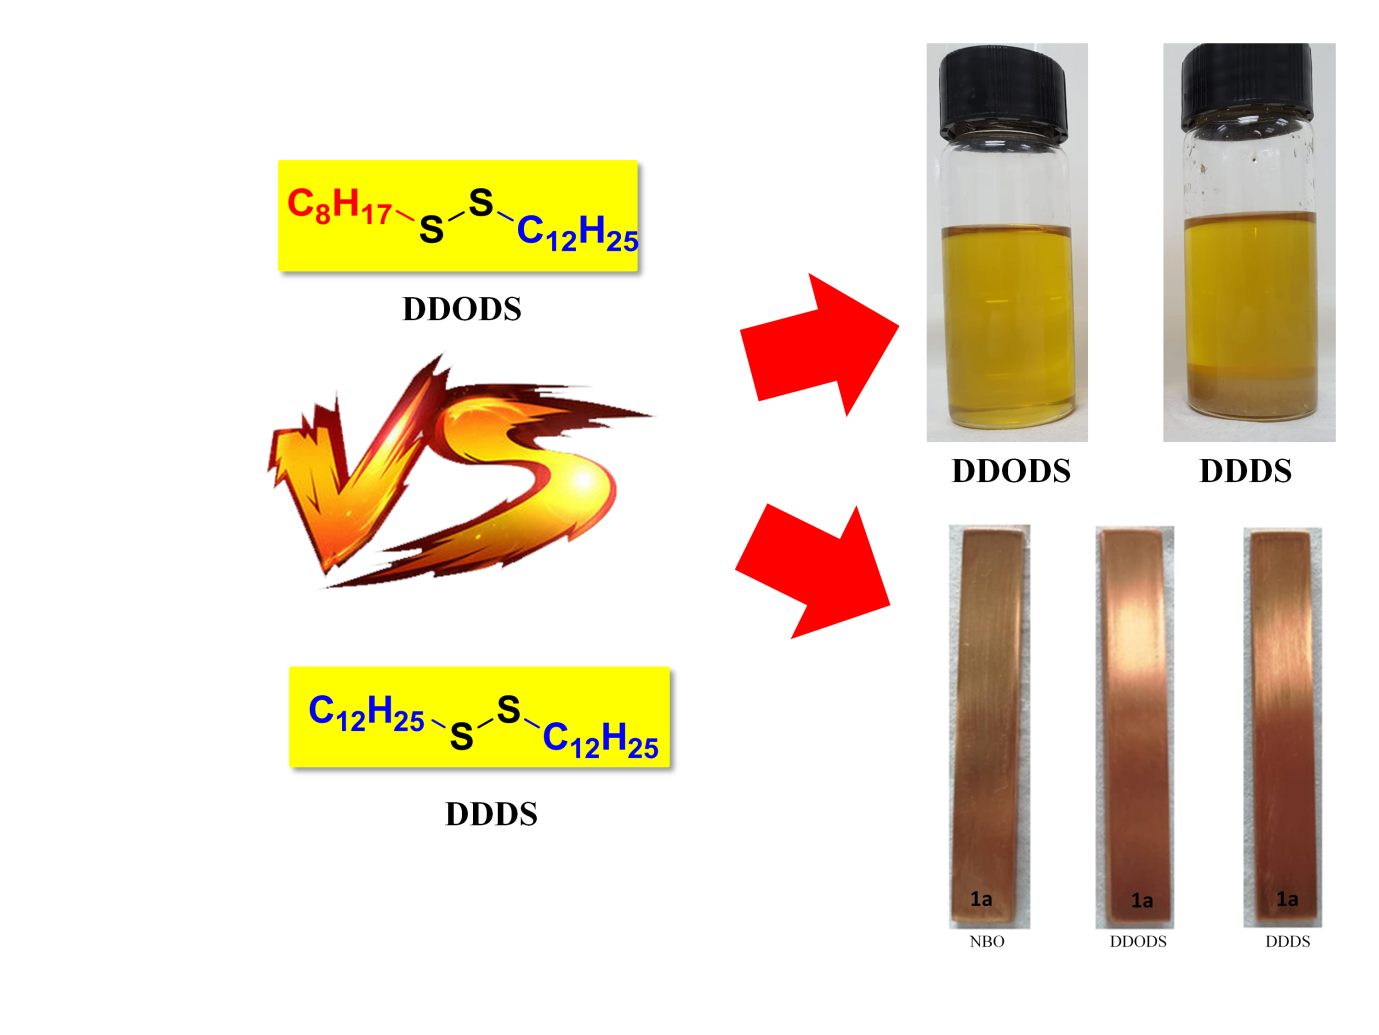

Supplement: Supplementary file 2 [file 43021d669d5e394f8eea3dfc.docx]
